# Supplementary material for: Hidden Sylvatic Foci of the Main Vector of Chagas Disease Triatoma infestans: Threats to the Vector Elimination Campaign?
Source: PubMed Central journal article supplement (PMC3201917; doi:10.1371/journal.pntd.0001365), 2011-10-25

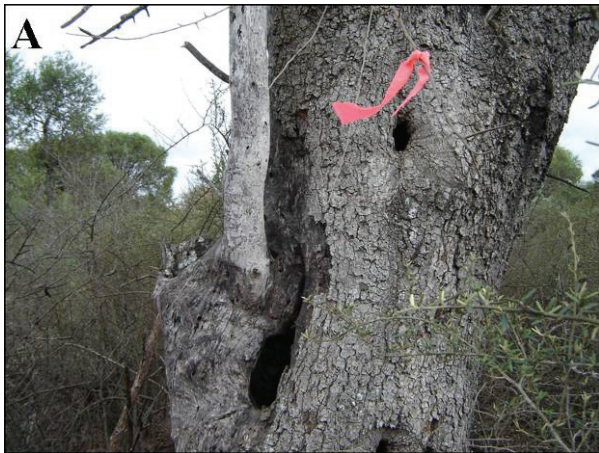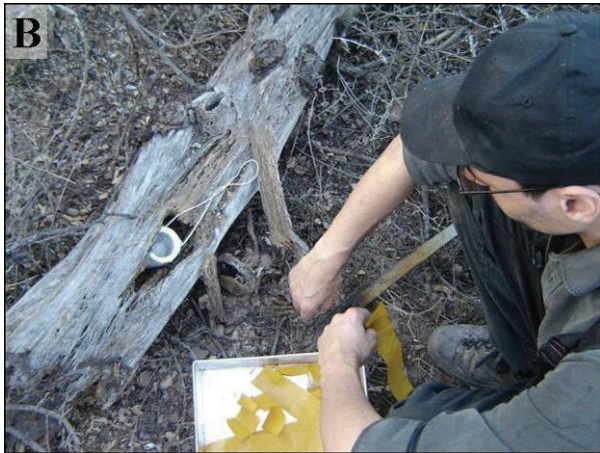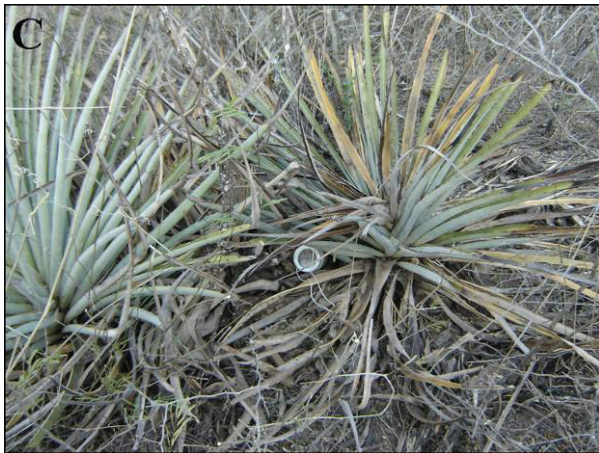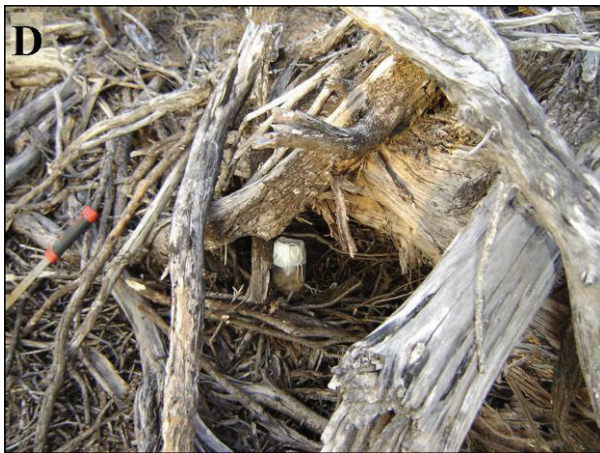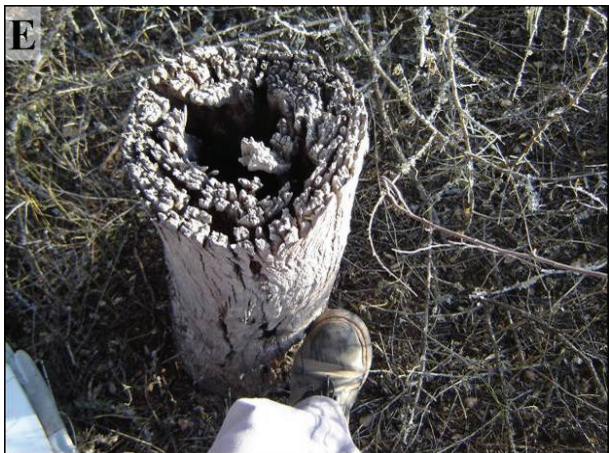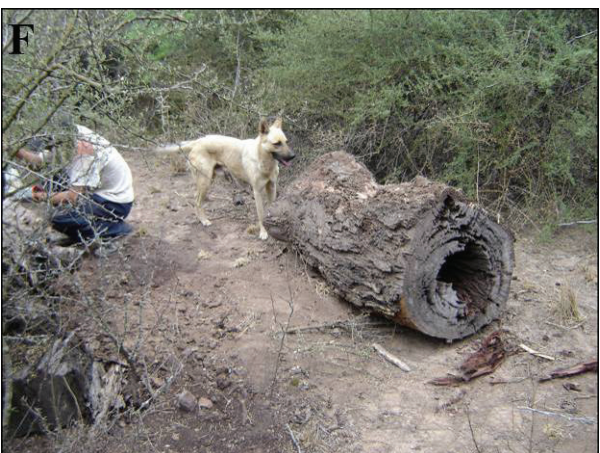

Supplement: pntd.0001365.s001.pdf [file pntd.0001365.s001.pdf]
